# Supplementary material for: Exploring the technological acceptance of a mobile learning tool used in the teaching of an indigenous language
Source: PeerJ Comput Sci. 2021 Jun 3;7:e550. doi: 10.7717/peerj-cs.550 (PMC8189028; doi:10.7717/peerj-cs.550)
Supplement: Supplemental Information 3 [file peerj-cs-07-550-s003.xlsx]

## Sheet: All Data
SOCIODEMOGRAPHIC FACTORS									PERCEPTION OF THE USE OF MOBILE LEARNING BY USERS							QUESTIONS RELATED TO UTAUT
	D1	D2	D3	D4	D5	D6	D7	D8	Q1	Q2	Q3	Q4	Q5	Q6	Q7	Q8	Q9	Q10	Q11	Q12	Q13	Q14	Q15	Q16	Q17
ID	D1. Gender	D2. Age	D3. Educ_level	D4. Type_dev	D5. Platform	D6. Own_Mob_dev	D7. Mob_dat_plan	D8. home_Internet_access	Q1 Importance_Mob	Q2 Use_app_learning	Q3 like_to_learn_mob	Q4 Mob_support_learning	Q5 Mob_dev_helps_performance	Q6 Future_mob_indispensable	Q7 Mob_in_class	PU1	PU2	PEU1	PEU2	SI1	SI2	FC1	FC2	PE1	PE2
ID	Gender	Age	Education level	Mobile device type	On which virtual platform do you download your applications? (Google Play Store, Apple App Store)	Do you currently have your own mobile device?	Do you have a mobile data plan?	Do you have Internet access at home?	How important is the use of mobile devices for academic learning?	Do you use or have you used a mobile application to learn a language?	Would you like to learn a new language using the mobile device?	Do you think that the mobile device is a tool that supports the learning of academic subjects?	Do you think that with the help of mobile devices you can improve a person's academic performance?	Do you think that in the future, with the advancement of technology, mobile devices will be essential in class hours?	Do you agree that mobile devices are used as learning tools during class hours?	Do you think that the mobile device is a tool that supports language learning?	Do you think that if you use a mobile device you will learn a language faster?	Is it easy to use a mobile device to learn a language?	Is it easy to learn how to use a mobile device and use it in education?	Did a teacher or person in authority promote the use of mobile devices to learn a language?	Does a close relative think that you can learn a language using mobile devices?	Is it easy to download documentation and applications to learn a language?	Is it easy to use applications to learn a language?	Is it fun to use the mobile device to learn a language?	Do I like to learn a language much more if I do it using a mobile device?
1	Female	21	TL	Sm	Gps	Yes	Yes	Yes	4	4	4	4	4	3	2	5	5	5	5	5	4	5	5	5	5
2	Male	18	SL	Sm	As	Yes	Yes	Yes	1	4	5	5	5	5	4	4	4	5	4	5	5	5	4	5	5
3	Male	18	SL	Sm	Gps	Yes	No	Yes	4	3	5	4	4	5	1	3	5	3	5	5	1	4	5	5	5
4	Female	23	TL	Sm, Ta	Gps	Yes	Yes	Yes	3	4	5	5	4	4	5	5	5	4	5	5	5	5	5	5	5
5	Female	23	TL	Sm	Gps	Yes	Yes	Yes	5	4	3	4	3	5	1	5	5	5	5	4	5	5	3	5	5
6	Male	22	TL	Sm, Ta	Gps	Yes	Yes	Yes	4	4	5	4	4	4	1	5	5	5	5	5	5	5	5	4	4
7	Male	23	TL	Sm	Gps	Yes	Yes	Yes	5	3	5	5	4	5	5	5	5	5	5	5	5	5	5	5	5
8	Male	45	MsC	Sm	Gps	Yes	Yes	Yes	4	4	5	5	5	5	5	5	5	5	5	5	5	5	5	5	5
9	Male	22	SL	Sm	Gps	Yes	Yes	Yes	3	2	5	4	4	4	1	3	5	3	5	5	5	3	5	5	5
10	Male	26	SL	Sm	As	Yes	Yes	Yes	3	3	5	4	4	2	5	5	5	3	5	5	5	1	1	5	5
11	Male	22	TL	Sm	Gps	Yes	Yes	Yes	4	4	5	4	4	4	5	4	3	3	5	1	5	5	5	5	5
12	Male	44	SL	Sm	Gps	Yes	Yes	Yes	5	1	5	5	5	4	5	3	5	5	5	5	5	5	5	5	5
13	Male	30	TL	Sm, Ta	Gps	Yes	Yes	Yes	5	4	4	4	4	4	5	3	5	5	5	3	5	4	5	5	5
14	Male	29	MsC	Sm, Ta	Gps	Yes	Yes	Yes	5	3	5	5	4	4	5	5	4	5	5	5	5	5	5	5	5
15	Male	24	TL	Sm	Gps	Yes	Yes	Yes	4	4	5	4	4	5	5	5	5	5	5	5	5	5	5	5	5
16	Male	19	SL	Sm	Gps	Yes	No	Yes	4	4	5	5	4	5	3	3	5	5	3	5	5	5	5	3	3
17	Male	23	SL	Sm	Gps	No	No	Yes	4	4	5	5	5	4	5	3	5	5	5	2	5	2	1	1	1
18	Male	44	MsC	Sm	Gps	Yes	Yes	Yes	4	4	5	4	4	5	1	5	3	4	5	5	4	5	5	5	5
19	Male	29	MsC	Sm, Ta	Other	Yes	Yes	Yes	3	2	3	4	2	1	1	5	3	3	5	5	5	5	5	5	5
20	Male	28	SL	Sm	Gps	Yes	No	Yes	5	4	5	5	5	5	5	3	5	5	5	1	5	3	5	1	3
21	Male	24	TL	Sm	Gps	Yes	Yes	Yes	5	4	5	4	4	4	1	5	5	5	5	5	5	5	5	5	5
22	Female	21	SL	Sm	Gps	Yes	No	Yes	5	3	5	5	5	4	5	3	5	5	5	5	5	1	1	2	5
23	Female	21	SL	Sm	As	Yes	Yes	Yes	4	4	3	4	4	4	1	5	5	5	3	1	5	3	2	4	5
24	Female	17	SL	Sm	Gps	Yes	Yes	Yes	3	4	5	4	5	5	5	5	5	5	4	5	3	5	5	5	4
25	Male	24	SL	Sm	As	Yes	No	Yes	3	4	3	4	3	4	1	3	5	5	5	1	5	5	5	3	3
26	Male	22	SL	Sm	Gps	Yes	No	Yes	4	4	5	4	4	5	5	3	5	5	5	5	1	3	1	1	5
27	Male	25	TL	Sm, Ta	As	Yes	Yes	Yes	3	4	4	4	4	4	4	5	4	5	5	5	5	5	5	5	5
28	Male	23	SL	Sm	As	Yes	No	Yes	5	4	5	5	5	5	5	3	5	4	5	4	2	5	5	1	5
29	Male	24	SL	Sm	As	Yes	No	Yes	5	4	5	5	5	5	5	3	5	5	5	5	5	4	5	5	1
30	Male	23	SL	Sm	Gps	Yes	No	Yes	5	3	5	5	4	4	5	5	5	5	5	5	1	5	5	5	5
31	Male	22	SL	Sm	Gps	Yes	No	Yes	5	3	5	5	5	5	5	5	5	5	5	5	5	5	4	5	2
32	Male	25	TL	Sm, Ta	Gps	Yes	Yes	Yes	3	4	3	4	4	4	5	5	5	5	5	5	5	5	5	5	5
33	Male	23	TL	Sm	Gps	Yes	Yes	Yes	5	5	5	5	5	5	5	5	5	5	5	5	4	5	5	5	5
34	Male	44	TL	Sm, Ta	Gps	Yes	Yes	Yes	2	1	3	3	1	1	2	5	5	5	5	5	5	5	5	4	4
35	Male	26	MsC	Sm	Other	Yes	Yes	Yes	4	4	3	4	4	4	1	5	3	3	3	5	5	5	5	5	5
36	Male	34	SL	Sm	As	Yes	Yes	Yes	3	1	2	3	3	4	1	5	5	5	5	1	5	5	5	5	5
37	Male	21	SL	Sm	Gps	Yes	Yes	Yes	5	1	5	5	4	5	5	3	5	5	4	5	5	5	5	5	5
38	Male	24	SL	Sm	As	Yes	No	Yes	4	4	3	4	4	3	1	5	5	5	5	1	5	5	5	1	5
39	Female	22	SL	Sm	As	Yes	No	Yes	3	3	1	4	4	4	1	3	5	4	5	1	5	4	5	5	5
40	Male	25	TL	Sm	Gps	Yes	No	Yes	5	4	3	5	5	4	5	5	5	5	3	1	5	5	5	1	1
41	Female	27	MsC	Sm, Ta	Gps	Yes	Yes	Yes	4	4	5	4	4	4	5	5	5	5	5	5	5	5	5	5	5
42	Male	22	SL	Sm	Gps	Yes	No	Yes	4	5	5	5	5	4	5	4	5	5	5	3	1	5	5	5	1
43	Male	44	SL	Sm	Gps	Yes	No	Yes	5	4	5	5	5	4	5	5	3	2	3	5	4	5	4	5	5
44	Female	21	SL	Sm	Gps	Yes	No	Yes	4	3	5	4	4	4	5	3	3	5	5	5	1	5	5	3	3
45	Male	27	TL	Sm	As	Yes	Yes	Yes	4	5	5	5	4	1	1	5	3	3	3	5	5	5	5	5	5
46	Male	24	TL	Sm	Gps	Yes	Yes	Yes	4	4	3	4	4	4	1	5	3	5	3	5	5	5	5	5	5
47	Male	34	TL	Sm	Gps	Yes	Yes	Yes	5	4	5	5	5	5	4	5	4	5	5	5	5	5	5	5	5
48	Male	24	TL	Sm	Gps	Yes	Yes	Yes	5	4	4	5	5	5	5	5	5	5	5	5	5	5	5	4	4
49	Male	21	SL	Sm	Gps	Yes	No	Yes	4	4	5	4	3	4	1	3	5	3	5	5	5	5	5	2	3
50	Male	22	SL	Sm	Gps	Yes	No	Yes	4	3	5	4	4	5	1	5	5	5	5	4	5	5	5	1	1
51	Female	23	SL	Sm	Gps	Yes	Yes	Yes	5	4	5	4	4	4	5	5	5	5	5	5	5	3	5	1	3
52	Female	25	SL	Sm	Gps	Yes	Yes	Yes	4	4	5	4	4	2	1	5	5	5	3	5	5	3	1	1	3
53	Male	23	SL	Sm, Ta	Gps	Yes	Yes	Yes	4	4	5	5	4	4	5	5	5	5	5	5	5	3	1	1	1
54	Male	22	SL	Sm	Gps	Yes	No	Yes	4	3	3	4	4	5	3	3	5	5	5	2	5	1	1	3	5
55	Male	25	SL	Sm	As	Yes	Yes	Yes	4	4	5	4	5	4	5	5	5	4	4	5	3	1	1	5	3
56	Male	25	SL	Sm, Ta	Gps	Yes	Yes	Yes	5	4	5	5	4	5	5	5	5	5	5	5	5	1	1	1	3
57	Female	23	SL	Sm	Gps	No	No	No	5	4	5	4	4	4	1	1	1	3	5	5	5	5	5	1	1
58	Male	27	TL	Sm	As	Yes	Yes	Yes	5	3	5	5	5	4	5	5	5	5	5	5	5	5	5	5	5
59	Male	25	TL	Sm	Gps	Yes	Yes	Yes	4	4	5	5	5	5	5	4	3	5	5	5	5	5	5	5	5
60	Male	21	SL	Sm, Ta	Gps	Yes	No	Yes	4	4	5	5	4	3	1	5	5	5	5	5	5	4	5	2	3
61	Male	15	SL	None	Gps	Yes	Yes	No	4	4	5	4	4	4	5	3	2	3	5	1	2	3	1	5	5
62	Male	17	SL	None	Gps	Yes	Yes	Yes	5	4	5	4	5	4	5	5	5	1	1	1	1	2	2	5	2
63	Male	19	SL	Sm	Gps	Yes	Yes	Yes	3	4	4	5	4	4	2	5	4	5	5	5	5	5	4	5	5
64	Male	18	SL	Sm	Gps	Yes	No	Yes	3	4	5	4	4	4	5	3	5	5	5	4	5	5	5	5	3
65	Female	24	TL	Sm	Gps	Yes	Yes	Yes	5	3	5	5	5	5	5	5	5	5	5	5	5	5	5	5	5
66	Male	29	TL	Sm	Gps	Yes	Yes	Yes	4	4	5	4	4	4	1	5	5	5	5	5	5	5	5	5	5
67	Male	38	TL	Sm, Ta	Other	Yes	Yes	Yes	4	4	5	4	4	5	5	5	3	5	5	5	5	5	3	5	5
68	Male	25	SL	Sm	Gps	Yes	Yes	Yes	5	3	4	5	5	5	5	5	5	5	4	5	3	1	1	1	3

## Sheet: Split Data
Questions		I strongly agree	I agree	I am So so	I disagree	I strongly disagree
Q1	How important is the use of mobile devices for academic learning?	25	29	12	1	1
Q2	Do you use or have you used a mobile application to learn a language?	3	45	14	2	4
Q3	Would you like to learn a new language using the mobile device?	50	5	11	1	1
Q4	Do you think that the mobile device is a tool that supports the learning of academic subjects?	30	36	2	0	0
Q5	Do you think that with the help of mobile devices you can improve a person's academic performance?	22	40	4	1	1
Q6	Do you think that in the future, with the advancement of technology, mobile devices will be essential in class hours?	25	35	3	2	3
Q7	Do you agree that mobile devices are used as learning tools during class hours?	39	3	2	3	21
Questions		I strongly agree	I agree	I am So so	I disagree	I strongly disagree
UP1	Do you think that the mobile device is a tool that supports language learning?	44	4	19	0	1
UP2	Do you think that if you use a mobile device you will learn a language faster?	51	5	10	1	1
FU1	Is it easy to use a mobile device to learn a language?	51	5	10	1	1
FU2	Is it easy to learn how to use a mobile device and use it in education?	54	5	8	0	1
IS1	Did a teacher or person in authority promote the use of mobile devices to learn a language?	50	4	2	2	10
IS2	Does a close relative think that you can learn a language using mobile devices?	53	4	3	2	6
CF1	Is it easy to download documentation and applications to learn a language?	47	5	8	2	6
CF2	Is it easy to use applications to learn a language?	49	4	2	2	11
EP1	Is it fun to use the mobile device to learn a language?	44	4	4	3	13
EP2	Do I like to learn a language much more if I do it using a mobile device?	43	4	12	2	7
